# Supplementary material for: Selected ion flow tube studies of the reactions of H3O+, NO+, O2+˙ and O−˙ ions with alkanes in He and N2 carrier gases at different temperatures
Source: Royal Society of Chemistry journal article supplement (doi:10.1039/d4cp03105a), 2024-01-01
Supplement: d4cp03105a1.pdf [file d4cp03105a1.pdf]

Supplementary information for  
**Selected ion flow tube studies of the reactions of H<sub>3</sub>O<sup>+</sup>, NO<sup>+</sup>, O<sub>2</sub><sup>++</sup>  
and O<sup>-</sup> reagent anions with alkanes at different temperatures in  
He and N<sub>2</sub> carrier gases**

Maroua Omezzine Gnioua<sup>1,2</sup>, Stefan J Swift<sup>1\*</sup> and Patrik Španěl<sup>1</sup>

<sup>1</sup>J Heyrovský Institute of Physical Chemistry of the CAS, v. v. i., Dolejškova 2155/3, 182 23 Prague 8, Czechia

<sup>2</sup>Faculty of Mathematics and Physics, Charles University, V Holešovičkách 2/747, 180 00, Prague 8, Czechia

**S1.** Product ions for the reactions of the reagent ions with the alkanes observed using the Voice200infinity with a N<sub>2</sub> carrier gas at a flow tube temperature of 393 K with 4 V at the LE lens. The relative molecular mass of the alkanes is shown in parentheses after the alkane name; for the product ions, the *m/z* value of the product ion is shown first, followed by the formula and the branching ratio in parentheses.

| Compound (RMM / Da)              | H <sub>3</sub> O <sup>+</sup>                                                                                                                                                    | NO <sup>+</sup>                                                                                            | O <sub>2</sub> <sup>++</sup>                                                                                                                                                                                                                                                                                                                                                                                                                                                                           |
|----------------------------------|----------------------------------------------------------------------------------------------------------------------------------------------------------------------------------|------------------------------------------------------------------------------------------------------------|--------------------------------------------------------------------------------------------------------------------------------------------------------------------------------------------------------------------------------------------------------------------------------------------------------------------------------------------------------------------------------------------------------------------------------------------------------------------------------------------------------|
| <b><i>n</i>-Hexane (86)</b>      | 85 C <sub>6</sub> H <sub>13</sub> <sup>+</sup> (51)<br>71 C <sub>5</sub> H <sub>11</sub> <sup>+</sup> (49)                                                                       | 85 C <sub>6</sub> H <sub>13</sub> <sup>+</sup> (88)<br>83 C <sub>6</sub> H <sub>11</sub> <sup>+</sup> (12) | 57 C <sub>4</sub> H <sub>9</sub> <sup>+</sup> (43)<br>56 C <sub>4</sub> H <sub>8</sub> <sup>++</sup> (31)<br>86 C <sub>6</sub> H <sub>14</sub> <sup>++</sup> (11)<br>42 C <sub>3</sub> H <sub>6</sub> <sup>+</sup> (8)<br>43 C <sub>3</sub> H <sub>7</sub> <sup>+</sup> (7)                                                                                                                                                                                                                            |
| <b>3-Methylpentane (86)</b>      | 85 C <sub>6</sub> H <sub>13</sub> <sup>+</sup> (48)<br>71 C <sub>5</sub> H <sub>11</sub> <sup>+</sup> (27)<br>C <sub>6</sub> H <sub>14</sub> .H <sub>3</sub> O <sup>+</sup> (25) | 85 C <sub>6</sub> H <sub>13</sub> <sup>+</sup> (100)                                                       | 56 C <sub>4</sub> H <sub>8</sub> <sup>++</sup> (62)<br>57 C <sub>4</sub> H <sub>9</sub> <sup>+</sup> (35)<br>71 C <sub>5</sub> H <sub>11</sub> <sup>+</sup> (3)                                                                                                                                                                                                                                                                                                                                        |
| <b>2,5-Dimethylhexane (114)</b>  | 113 C <sub>8</sub> H <sub>17</sub> <sup>+</sup> (86)<br>C <sub>8</sub> H <sub>18</sub> .H <sub>3</sub> O <sup>+</sup> (14)                                                       | 113 C <sub>8</sub> H <sub>17</sub> <sup>+</sup> (100)                                                      | 99 C <sub>7</sub> H <sub>15</sub> <sup>+</sup> (29)<br>57 C <sub>4</sub> H <sub>9</sub> <sup>+</sup> (30)<br>71 C <sub>5</sub> H <sub>11</sub> <sup>+</sup> (13)<br>112 C <sub>8</sub> H <sub>16</sub> <sup>++</sup> (8)<br>70 C <sub>5</sub> H <sub>10</sub> <sup>++</sup> (8)<br>43 C <sub>3</sub> H <sub>7</sub> <sup>+</sup> (5)<br>42 C <sub>3</sub> H <sub>7</sub> <sup>+</sup> (3)<br>114 C <sub>8</sub> H <sub>18</sub> <sup>+</sup> (2)<br>56 C <sub>4</sub> H <sub>8</sub> <sup>++</sup> (2) |
| <b>2,3-Dimethylheptane (128)</b> | 127 C <sub>9</sub> H <sub>19</sub> <sup>+</sup> (78)<br>C <sub>9</sub> H <sub>20</sub> .H <sub>3</sub> O <sup>+</sup> (22)                                                       | 127 C <sub>9</sub> H <sub>19</sub> <sup>+</sup> (100)                                                      | 84 C <sub>6</sub> H <sub>12</sub> <sup>+</sup> (42)<br>85 C <sub>6</sub> H <sub>13</sub> <sup>+</sup> (32)<br>71 C <sub>5</sub> H <sub>11</sub> <sup>+</sup> (8)<br>83 C <sub>6</sub> H <sub>11</sub> <sup>++</sup> (7)<br>56 C <sub>4</sub> H <sub>8</sub> <sup>++</sup> (3)<br>70 C <sub>5</sub> H <sub>10</sub> <sup>++</sup> (3)<br>57 C <sub>4</sub> H <sub>9</sub> <sup>+</sup> (2)<br>69 C <sub>5</sub> H <sub>9</sub> <sup>++</sup> (2)<br>43 C <sub>3</sub> H <sub>7</sub> <sup>+</sup> (1)   |

**S2.** Product ions for the reactions of the reagent ions with the alkanes observed using the Voice200infinity with a N<sub>2</sub> carrier gas at a flow tube temperature of 393 K with 7 V at the LE lens. The relative molecular mass of the alkanes is shown in parentheses after the alkane name; for the product ions, the *m/z* value of the product ion is shown first, followed by the formula and the branching ratio in parentheses.

| Compound (RMM / Da)              | H <sub>3</sub> O <sup>+</sup>                                                                                              | NO <sup>+</sup>                                                                                            | O <sub>2</sub> <sup>+</sup>                                                                                                                                                                                                                                                                                                                                                                                                                                                                         |
|----------------------------------|----------------------------------------------------------------------------------------------------------------------------|------------------------------------------------------------------------------------------------------------|-----------------------------------------------------------------------------------------------------------------------------------------------------------------------------------------------------------------------------------------------------------------------------------------------------------------------------------------------------------------------------------------------------------------------------------------------------------------------------------------------------|
| <b><i>n</i>-Hexane (86)</b>      | 85 C <sub>6</sub> H <sub>13</sub> <sup>+</sup> (46)<br>71 C <sub>5</sub> H <sub>11</sub> <sup>+</sup> (54)                 | 85 C <sub>6</sub> H <sub>13</sub> <sup>+</sup> (85)<br>83 C <sub>6</sub> H <sub>11</sub> <sup>+</sup> (15) | 57 C <sub>4</sub> H <sub>9</sub> <sup>+</sup> (45)<br>56 C <sub>4</sub> H <sub>8</sub> <sup>+</sup> (35)<br>42 C <sub>3</sub> H <sub>6</sub> <sup>+</sup> (8)<br>43 C <sub>3</sub> H <sub>7</sub> <sup>+</sup> (7)<br>86 C <sub>6</sub> H <sub>14</sub> <sup>+</sup> (5)                                                                                                                                                                                                                            |
| <b>3-Methylpentane (86)</b>      | 85 C <sub>6</sub> H <sub>13</sub> <sup>+</sup> (68)<br>71 C <sub>5</sub> H <sub>11</sub> <sup>+</sup> (32)                 | 85 C <sub>6</sub> H <sub>13</sub> <sup>+</sup> (96)<br>86 C <sub>6</sub> H <sub>14</sub> <sup>+</sup> (4)  | 56 C <sub>4</sub> H <sub>8</sub> <sup>+</sup> (62)<br>57 C <sub>4</sub> H <sub>9</sub> <sup>+</sup> (35)<br>71 C <sub>5</sub> H <sub>11</sub> <sup>+</sup> (3)                                                                                                                                                                                                                                                                                                                                      |
| <b>2,5-Dimethylhexane (114)</b>  | 113 C <sub>8</sub> H <sub>17</sub> <sup>+</sup> (93)<br>C <sub>8</sub> H <sub>18</sub> .H <sub>3</sub> O <sup>+</sup> (7)  | 113 C <sub>8</sub> H <sub>17</sub> <sup>+</sup> (100)                                                      | 57 C <sub>4</sub> H <sub>9</sub> <sup>+</sup> (40)<br>99 C <sub>7</sub> H <sub>15</sub> <sup>+</sup> (24)<br>71 C <sub>5</sub> H <sub>11</sub> <sup>+</sup> (12)<br>112 C <sub>8</sub> H <sub>16</sub> <sup>+</sup> (7)<br>70 C <sub>5</sub> H <sub>10</sub> <sup>+</sup> (7)<br>43 C <sub>3</sub> H <sub>7</sub> <sup>+</sup> (5)<br>42 C <sub>3</sub> H <sub>7</sub> <sup>+</sup> (2)<br>56 C <sub>4</sub> H <sub>8</sub> <sup>+</sup> (2)<br>114 C <sub>8</sub> H <sub>18</sub> <sup>+</sup> (1) |
| <b>2,3-Dimethylheptane (128)</b> | 127 C <sub>9</sub> H <sub>19</sub> <sup>+</sup> (78)<br>C <sub>9</sub> H <sub>20</sub> .H <sub>3</sub> O <sup>+</sup> (22) | 127 C <sub>9</sub> H <sub>19</sub> <sup>+</sup> (100)                                                      | 84 C <sub>6</sub> H <sub>12</sub> <sup>+</sup> (37)<br>85 C <sub>6</sub> H <sub>13</sub> <sup>+</sup> (32)<br>71 C <sub>5</sub> H <sub>11</sub> <sup>+</sup> (8)<br>83 C <sub>6</sub> H <sub>11</sub> <sup>+</sup> (7)<br>56 C <sub>4</sub> H <sub>8</sub> <sup>+</sup> (6)<br>70 C <sub>5</sub> H <sub>10</sub> <sup>+</sup> (3)<br>57 C <sub>4</sub> H <sub>9</sub> <sup>+</sup> (3)<br>69 C <sub>5</sub> H <sub>9</sub> <sup>+</sup> (2)<br>43 C <sub>3</sub> H <sub>7</sub> <sup>+</sup> (2)    |
